# Supplementary material for: β-Cyclodextrin stabilized magnetic Fe3S4 nanoparticles for efficient removal of Pb(ii)
Source: Royal Society of Chemistry journal article supplement (doi:10.1039/c5ta03442f), 2015-01-01
Supplement: c5ta03442f1.pdf [file c5ta03442f1.pdf]

## Supporting Information

### **$\beta$ -Cyclodextrins Stabilized Magnetic $\text{Fe}_3\text{S}_4$ Nanoparticles for Efficient Removal of Pb (II)**

Long Kong,<sup>a</sup> Lili Yan,<sup>b</sup> Zan Qu,<sup>a</sup> Naiqiang Yan,<sup>a</sup> and Liang Li<sup>a\*</sup>

<sup>a</sup>School of Environmental Science and Engineering, Shanghai Jiao Tong University, Shanghai 200240, China. E-mail: liangli117@sjtu.edu.cn; Tel: +86 21 54747567

<sup>b</sup>School of Agriculture and Biology, Shanghai Jiao Tong University, Shanghai 200240, China.

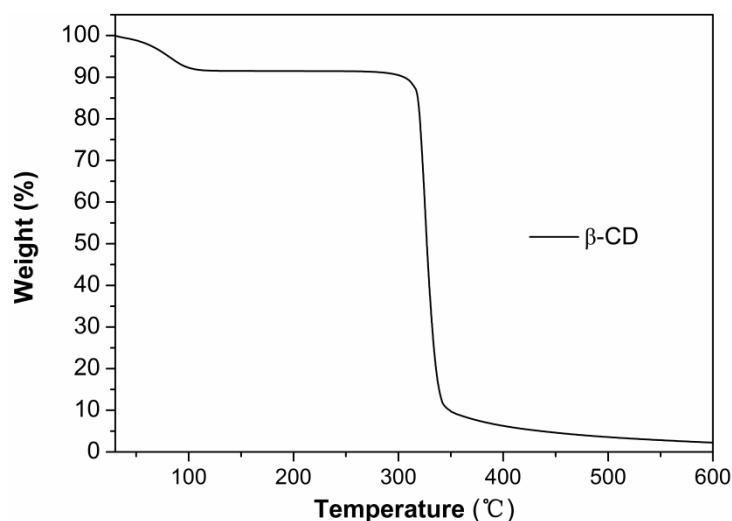

**Fig S1** TGA curve of  $\beta$ -CD

The TGA result of  $\beta$ -CD was shown in Figure S1. Under the temperature range of 30-600 °C, the  $\beta$ -CD was almost completely decomposed with a residual weight about 2%. And the surface  $\beta$ -CD of  $\text{CD-Fe}_3\text{S}_4$  could also be decomposed. Based on the TGA analysis data of Fig 4 and Fig S1, the weight percentage of  $\beta$ -CD in  $\text{CD}_1\text{-Fe}_3\text{S}_4$  and  $\text{CD}_2\text{-Fe}_3\text{S}_4$  could be estimated. Thus, the  $\beta$ -CD was calculated to be 3.69% and 6.85% for  $\text{CD}_1\text{-Fe}_3\text{S}_4$  and  $\text{CD}_2\text{-Fe}_3\text{S}_4$ , respectively.

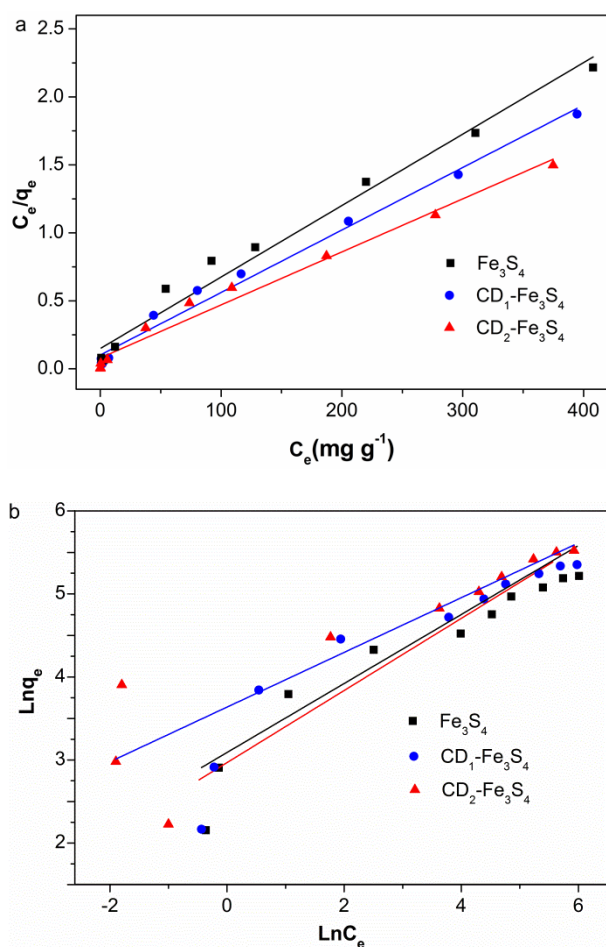

**Figure S2.** The fittings of Langmuir model (a) and Freundlich model (b) for the adsorption of Pb (II) by  $\text{Fe}_3\text{S}_4$ ,  $\text{CD}_1\text{-Fe}_3\text{S}_4$  and  $\text{CD}_2\text{-Fe}_3\text{S}_4$ . The symbols are experimental data; the solid lines represent the fitted curves.

**Table S1** Adsorption isotherm parameters for Langmuir and Freundlich model of Pb (II) adsorption by  $\text{Fe}_3\text{S}_4$ ,  $\text{CD}_1\text{-Fe}_3\text{S}_4$  and  $\text{CD}_2\text{-Fe}_3\text{S}_4$ .

| Adsorbent                           | Langmuir model              |                             |       | Freundlich model            |      |       |
|-------------------------------------|-----------------------------|-----------------------------|-------|-----------------------------|------|-------|
|                                     | $Q_m$ (mg g <sup>-1</sup> ) | $K_L$ (L mg <sup>-1</sup> ) | $R^2$ | $K_F$ (mg g <sup>-1</sup> ) | n    | $R^2$ |
| $\text{Fe}_3\text{S}_4$             | 190.11                      | 0.035                       | 0.979 | 18.31                       | 2.43 | 0.912 |
| $\text{CD}_1\text{-Fe}_3\text{S}_4$ | 217.39                      | 0.045                       | 0.987 | 21.93                       | 2.41 | 0.874 |
| $\text{CD}_2\text{-Fe}_3\text{S}_4$ | 256.41                      | 0.049                       | 0.979 | 38.00                       | 3.04 | 0.807 |

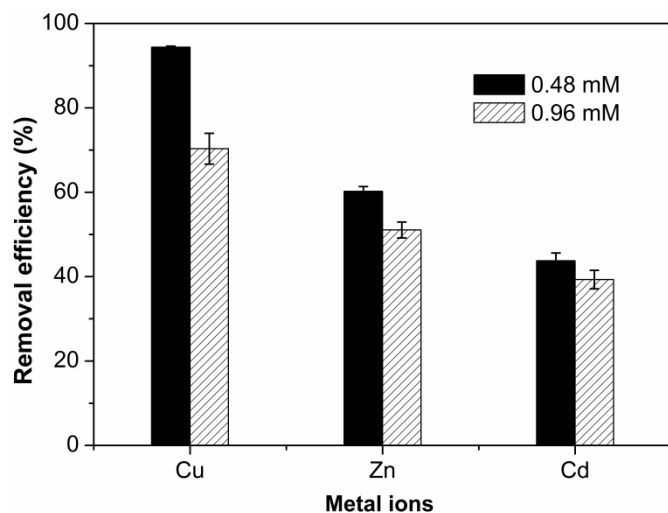

**Fig S3** Removal efficiency of Cu (II), Zn (II), and Cd (II) by  $CD_2-Fe_3S_4$ . Experiment conditions: Metal ions concentration (0.48, 0.96 mM), Pb (II) concentration  $100\text{ mg L}^{-1}$  (50 mL), sorbent 35 mg, pH 6.0, contact time 24 h, temperature  $25\text{ }^\circ\text{C}$ .

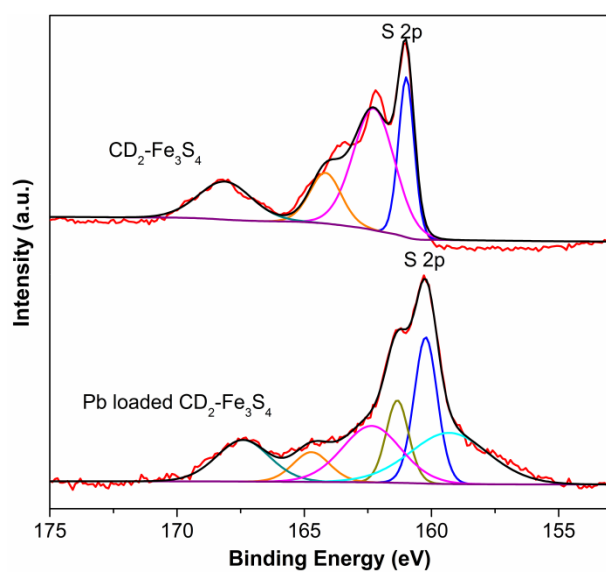

**Fig S4** XPS spectra of S 2p regions for  $CD_2-Fe_3S_4$  before and after Pb (II) adsorption.
